# Supplementary material
Source: Springer Nature journal article supplement (https://www.springermedizin.de/resource/supplementary/12943_2009_636_MOESM5_ESM.pdf/9554458)

A

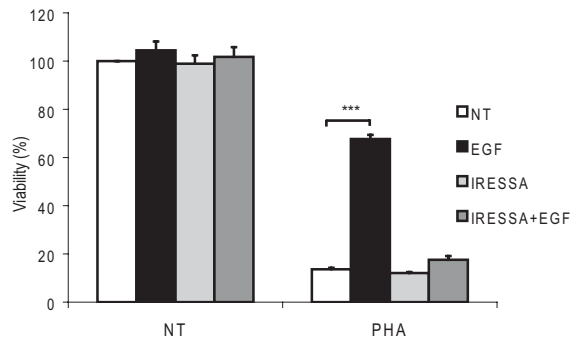

B

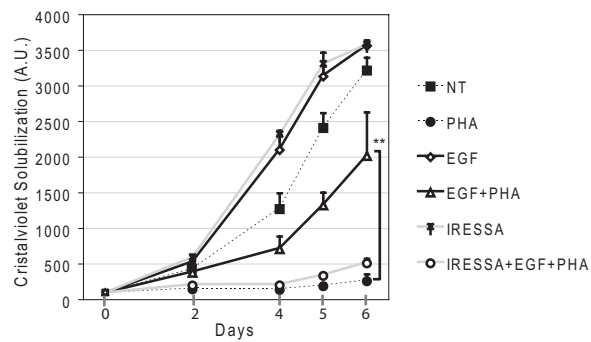

C

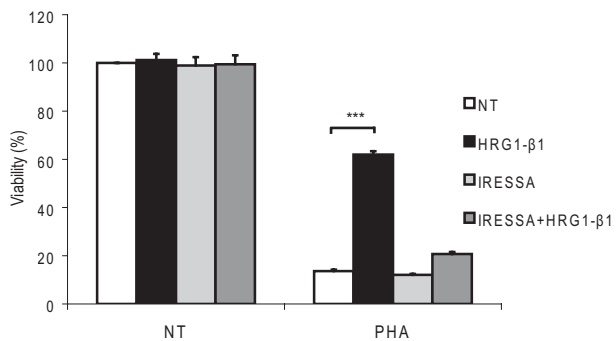

D

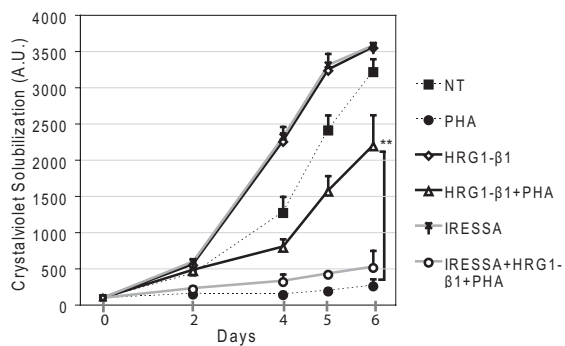

Supplement: MOESM5 [file 9554458]
